# Supplementary material
Source: PubMed Central journal article supplement (PMC5771465)
Supplement: NIHMS75715-supplement-SI_Figs.pdf [file NIHMS75715-supplement-SI_Figs.pdf]

**A**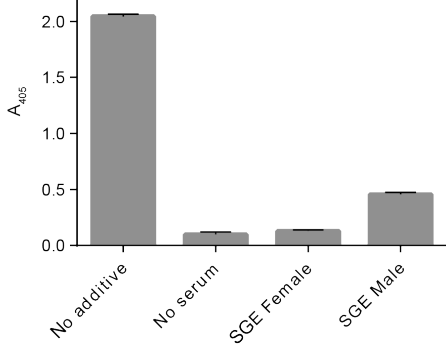**B**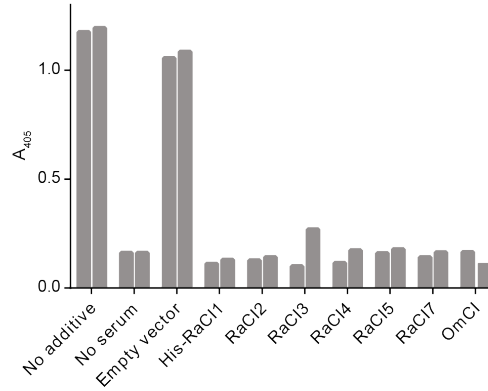**C**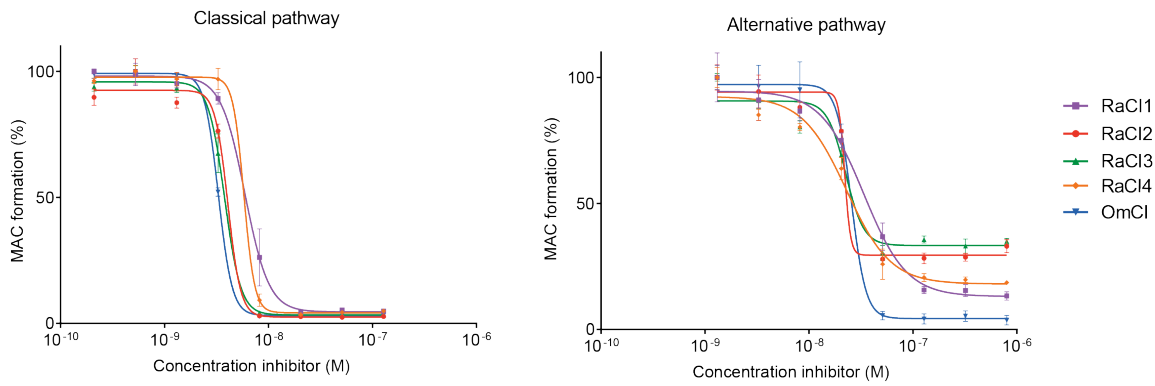**D**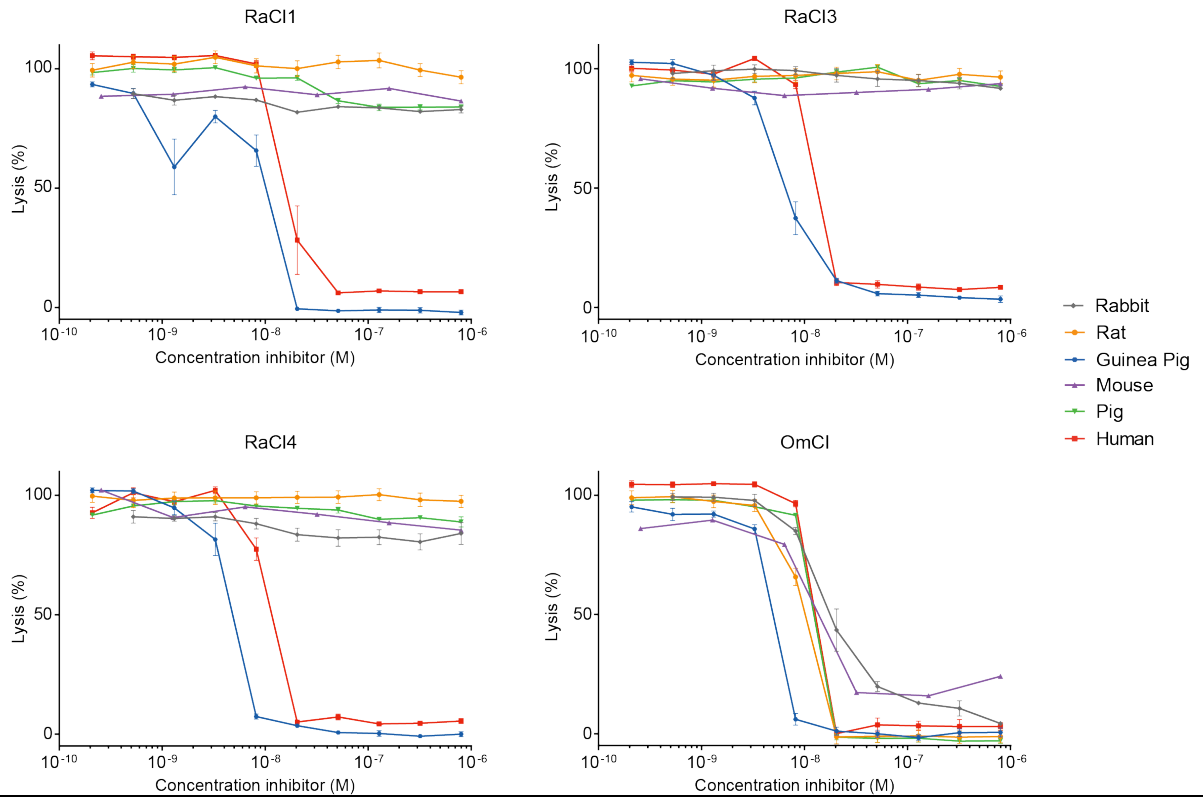

## Supplementary Figure 1

Complement inhibition by Salivary Gland Extract (SGE) and RaCI homologues.

(A) SGE from both male and female ticks inhibit the classical pathway in a haemolysis assay. SGE equalling 2 glands (female) or 1 gland (male) were added to the haemolysis assay. Error bars, s.e.m. ( $n = 3$  technical replicates). (B) Inhibition of classical pathway in a haemolysis assay with supernatants from stable transfected *Drosophila melanogaster* S2 cell lines. Individual values of two technical replicates are shown. (C) Classical and alternative pathway inhibition by RaCI family members and OmCI using an ELISA based activation assay, similar to the Wieslab assay used in Fig. 1b. The difference between the  $IC_{50}$  values for CP and AP inhibition likely reflects the difference in C5 concentrations used in the assays (1% serum in CP assay versus 10% serum in the AP assay). Error bars, s.e.m. ( $n = 3$  technical replicates). (D) Cross-species reactivity of RaCI homologues and OmCI in a haemolysis assay. Error bars, s.e.m. ( $n = 3$  technical replicates).

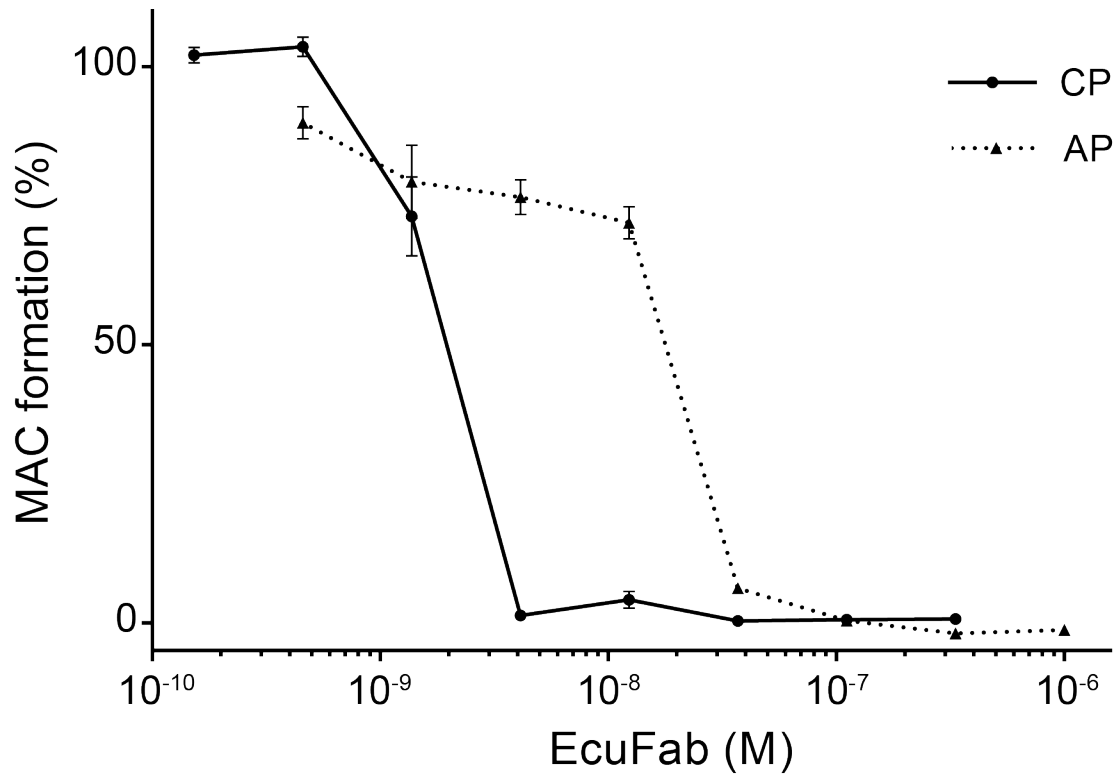

**Supplementary Figure 2**

The custom-made Fab (EcuFab), based on the sequence of Eculizumab, is a fully active complement inhibitor.

The custom-made Fab (EcuFab), based on the sequence of Eculizumab, is a fully active complement inhibitor. Classical (CP) and alternative (AP) pathway inhibition by the Fab fragment using an ELISA based activation assay show that the IC<sub>50</sub> values are similar to RaCIs and OmCI in Supplementary Figure 1. Error bars, s.e.m. (*n* = 3 technical replicates).

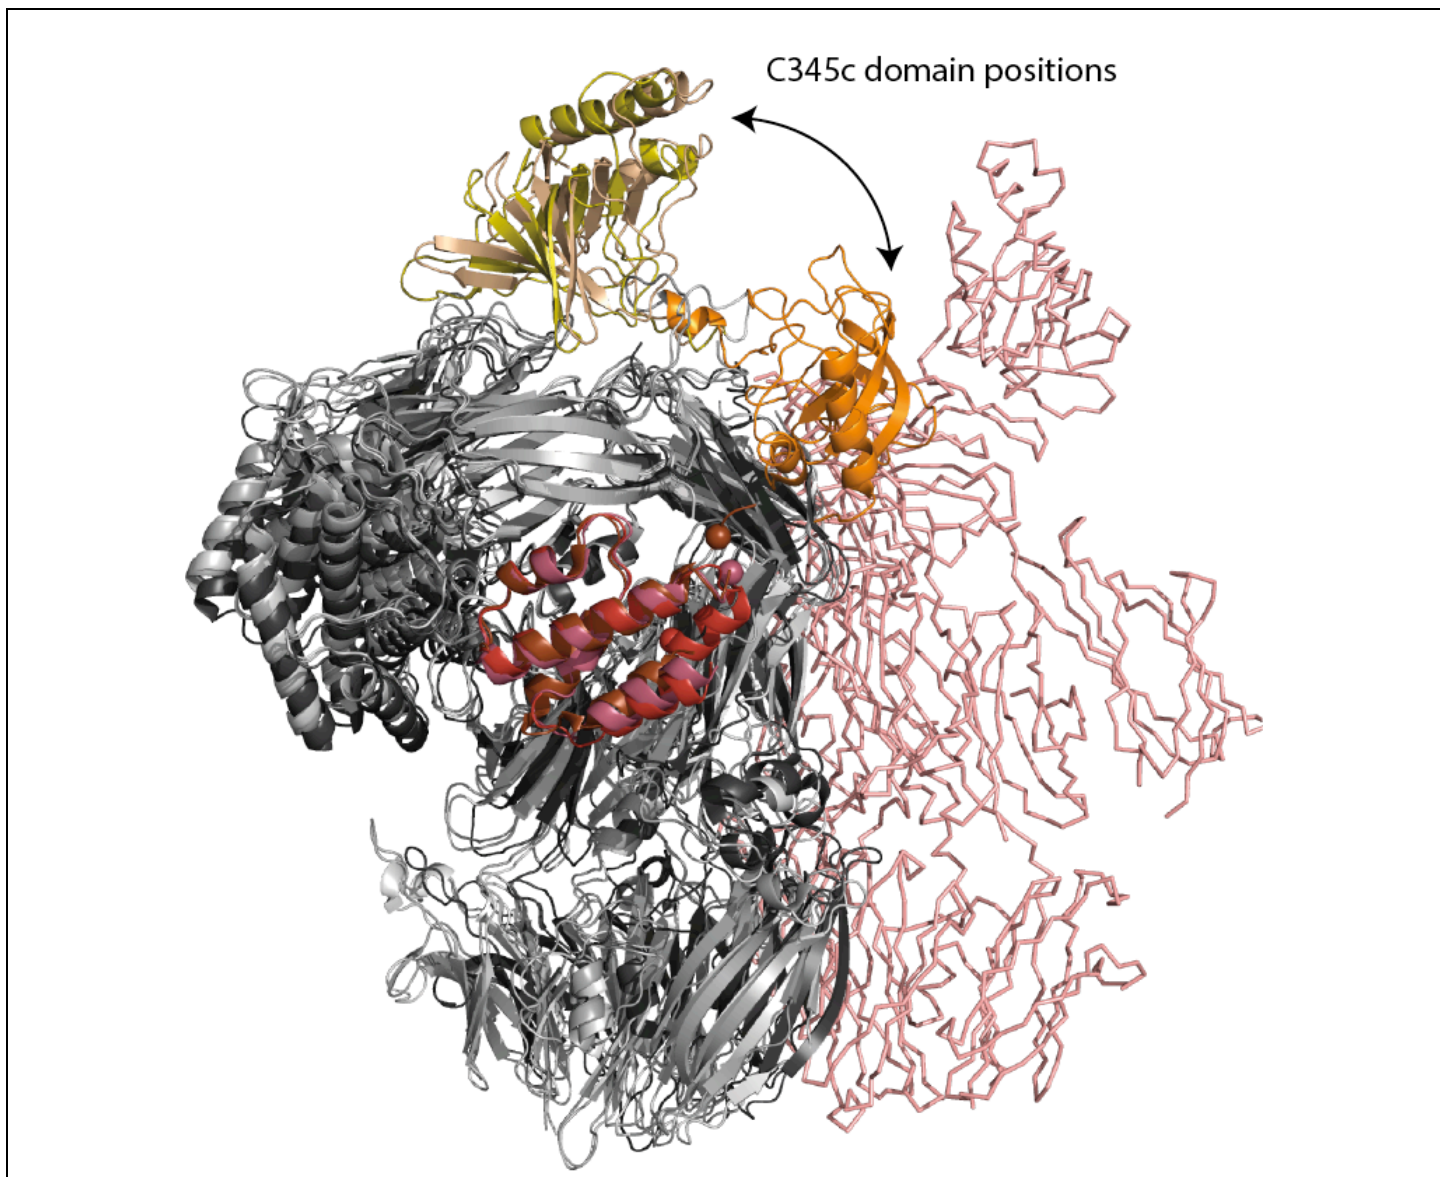

### Supplementary Figure 3

Different location of C345c domain our new structures of inhibited C5 compared to apo-C5.

Different location of C345c domain with respect to the rest of C5 in our new structures of inhibited C5 (wheat) compared to the earlier structures of apo-C5 (orange; Fredslund *et al.*, *Nat. Immunol.* **9**, 753-760, 2011). The new location is consistent with that previously seen in the CVF-C5 complex (olive; Laursen *et al.*, *EMBO J.* **9**, 606-616, 2011). The CVF component of the C5-CVF complex is shown in a salmon ribbon representation highlighting the clash with the C345c domain in the apo-C5 like position. The residues that will form the anaphylatoxin C5a are coloured in shades of red and the overall view is the same as in the close-up of this region shown in Figure 3. The structures are overlaid by superposition of the C5a domain in each structure.

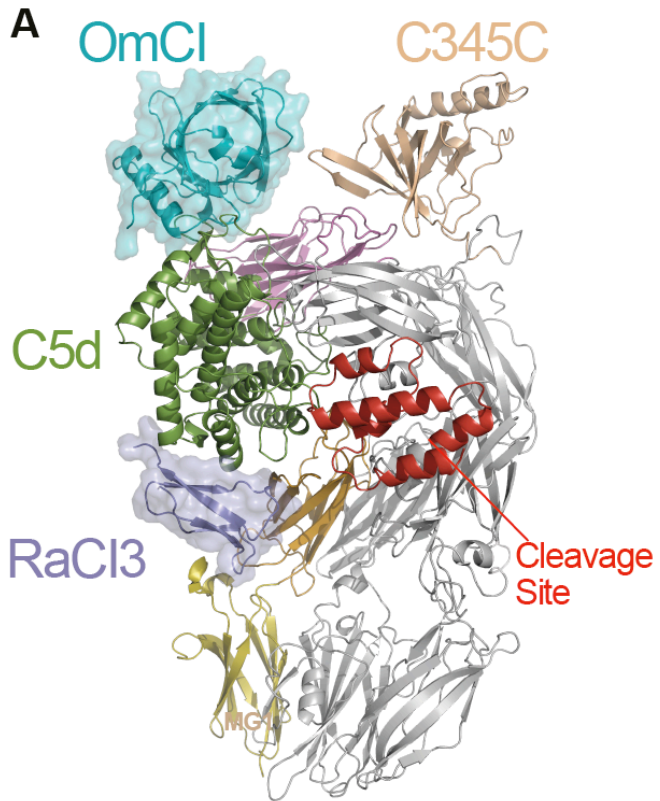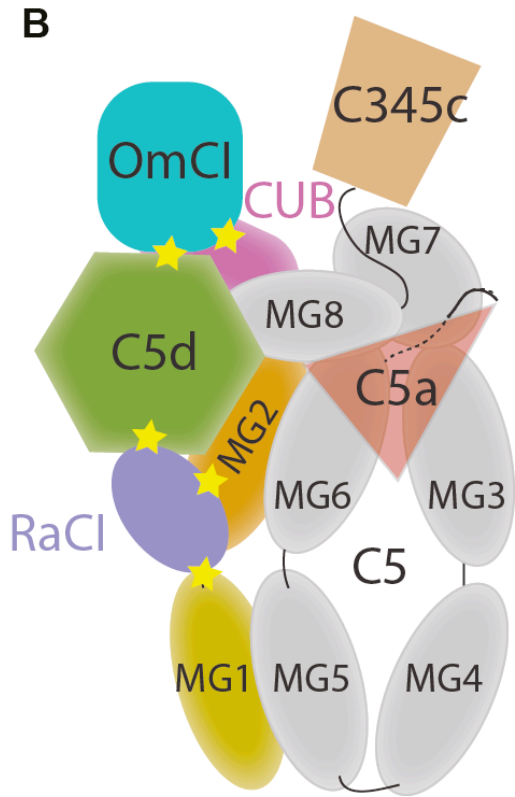

**Supplementary Figure 4**

Overviews of ternary complex

(A) Front view of C5-OmCl-RaCl3 complex. (B) Cartoon showing domain organisation of C5 and interaction sites for both tick-inhibitors (yellow stars)

## MG1 - MG2

|                              |     |                                                                                           |     |
|------------------------------|-----|-------------------------------------------------------------------------------------------|-----|
| <i>Homo_sapiens</i>          | 20  | EQTYVISAPKIFRVGASENIVIQVYGYTEAFDATISIKSYDPDKKFSYSSGHVHLSSENKFQNSAILTI                     | 87  |
| <i>Macaca_mulatta</i>        | 20  | EQTYVISAPKIFRVGASENIVIQVYGYTEAFDATISIKSYDPDKKFSYSSGHVHLSSENKFQNSAVLTI                     | 87  |
| <i>Canis_lupus</i>           | 20  | EQTYVISAPKIVFRVGASENVIQVYGYTEEFDATISIKSYDPDRKFSYSSGYVTLSPENKFQNNVVLTI                     | 87  |
| <i>Felis_catus</i>           | 20  | EQTYVISAPKIFRVGASENIVIQVYGYTEAFDATISLKSYPDKKFSYSSGYVTLSMENKFQNSAVLTV                      | 87  |
| <i>Sus_scrofa</i>            | 20  | EQTYVISAPKILHVGAENIVVQVYGYTEAFVTVSVKSYDPDKKITYSSMYVILSTENKFQNSAFLTI                       | 87  |
| <i>Cavia_porcellus</i>       | 20  | EQTYVISASKVLRVGASENIVIQVYGYTEAFDATISLKSYPDKKFSYASEYVNLSPENKFQNSAFLTI                      | 87  |
| <i>Oryctolagus_cuniculus</i> | 20  | EQTYVISAPKIVLRVGASENIVIQVYGYTEAFDSTISIKSYDPDKKFSYSSGYVLSSENKFQNSATLTI                     | 87  |
| <i>Rattus_norvegicus</i>     | 25  | EQTYVISAPKIFRVGSSENVVIQAHGYTEAFDATISLKSYPDKKVITYSSGYVNLSPENKFQNSALLTL                     | 92  |
| <i>Mus_musculus</i>          | 25  | EQTYVISAPKILRVGSSENVVIQVHGYTEAFDATLSLKSYPDKKVTFSSGYVNLSPENKFQNAALLTL                      | 92  |
|                              |     |                                                                                           |     |
| <i>Homo_sapiens</i>          | 88  | QPKQLP <b>GGQ</b> NPVSYVYLEVSKHFSKSKRMPITYDNGFLFIHTDKPVYTPDQSVKVRVYSLNDDLKPA              | 155 |
| <i>Macaca_mulatta</i>        | 88  | QPKQLP <b>GGQ</b> QVSYVYLEVSKHFSKSKKIPITYDNGFLFIHTDKPVYTPDQSVKVRVYSLNDDLKPA               | 155 |
| <i>Canis_lupus</i>           | 88  | QPKQL <b>SGGQ</b> GPVSHVYLEVSRHFSKSKKVPITYDNGFLFIHTDKPIYTPQSVKVRVYSLNDDLKPA               | 155 |
| <i>Felis_catus</i>           | 88  | QPKQL <b>SGGQ</b> NPVSHVYLEVSKHFSRSKSKVPITYDNGFLFIHTDKPVYTPQSVKVRVYSLNDDLKPA              | 155 |
| <i>Sus_scrofa</i>            | 88  | QPKQL <b>L</b> L <b>GKPN</b> SVSHVYLDIVSKHFSRSKSKIPVITYDNGFLFIHTDKPVYTPHQSVKVRVYSLNDELKPA | 155 |
| <i>Cavia_porcellus</i>       | 88  | QPKQL <b>SGGQ</b> NSVSHVYLEVSKHFSKSKKMPITYDNGFLFIHTDKPVYTPHQSVKVRVYSLNDDLKPA              | 155 |
| <i>Oryctolagus_cuniculus</i> | 88  | QPKQL <b>STGQ</b> NAPSHVYLEVSKHFSRSKSKMPITYDNGFLFIHTDKPVYTPHQSVKVRVYSLNDDLKPA             | 155 |
| <i>Rattus_norvegicus</i>     | 92  | PPKQ <b>F</b> PRDENPVSHVYLEVSMHFSKSKKIPITYDNGFLFIHTDKPVYTPDQSVKIRVYSLSDDLKPA              | 160 |
| <i>Mus_musculus</i>          | 92  | QPNQ <b>V</b> PREESPVSHVYLEVSKHFSKSKKIPITYNNGILFIHTDKPVYTPDQSVKIRVYSLGDDLKPA              | 160 |
|                              |     |                                                                                           |     |
| <i>Homo_sapiens</i>          | 156 | KRETVLTFIDP <b>EGSE</b> EVDMEVEIDHIGIISFPDFKIPSNPRYGMWTIKAK <b>YKED</b> FSTTGTAFFEVKEYV   | 223 |
| <i>Macaca_mulatta</i>        | 156 | KRETVLTFIDP <b>EGSE</b> IDMVEEIDHIGIISFPDFKIPSNPRYGMWMIQAK <b>YKED</b> FSTTGTAFFEVKEYV    | 223 |
| <i>Canis_lupus</i>           | 156 | KRETVLTYIDP <b>EGSE</b> EVDIVEENDYTGIIISFPDFKIPSNPKYGVWTIRAK <b>YKED</b> FSTTGTTQFEVKEYV  | 223 |
| <i>Felis_catus</i>           | 156 | KRETVLTYIDP <b>EGSE</b> EVDIMEENDYTGIIISFPDFKIPSNPKYGVWTIRAK <b>YKED</b> FSTTATAYFEIKEYV  | 223 |
| <i>Sus_scrofa</i>            | 156 | KRETVLTFIDP <b>QGS</b> EVEVLEENDYTGIIISFPDFKIPSNPKYGVWTIQAK <b>YRE</b> DFSTTGTAFFEVKEYV   | 223 |
| <i>Cavia_porcellus</i>       | 156 | KRETVLTFIDP <b>EGSE</b> EVDMEVEENDYTGIIISFPDFKIPPNPKYGMWTIKAK <b>YKED</b> FSTSGTTHFEIKEYV | 223 |
| <i>Oryctolagus_cuniculus</i> | 156 | KRETVLVFIDP <b>EGSE</b> EVDMEVEENDYTGIIISFPDFKIPSNPKYGVWTIKAK <b>YKED</b> FSTTGTTYFEVKEYV | 223 |
| <i>Rattus_norvegicus</i>     | 161 | KRETVLTFVDP <b>EGT</b> EVDIVEENDYTGIIISFPDFKIPSNPKYGVWTIKAK <b>YKED</b> FTTTGTAYFEVKEYV   | 228 |
| <i>Mus_musculus</i>          | 161 | KRETVLTFIDP <b>EGSE</b> EVDIVEENDYTGIIISFPDFKIPSNPKYGVWTIKAN <b>YKED</b> FTTTGTAYFEIKEYV  | 228 |

### Supplementary Figure 5

RaCI contacts mapped onto cross-species sequence alignment of the MG1 and MG2 domains of C5.

C5 residues that make contact with one or more RaCIs in the crystal structures are highlighted in black (van der Waals interaction) and red (salt or hydrogen bonds).

## C5d

|                              |      |                                                                        |      |
|------------------------------|------|------------------------------------------------------------------------|------|
| <i>Homo_sapiens</i>          | 982  | LLVGEILSAVLSQEGINILTHLPGGSAEAEELMSVVPVFYVFHYLETGNHWNIFHSDPLIEKQKLLK    | 1047 |
| <i>Macaca_mulatta</i>        | 982  | LLVGEILSAVLSREGINILTHLPGGSAEAEELMSVVPVFYVFHYLETGNHWNIFHSDPLIEKRNLEK    | 1047 |
| <i>Canis_lupus</i>           | 982  | MLMGEVMSAVLSQEGIDILTHLPGGNAEAEELMSVVPVFYVFHYLEAGSNWNIFSPNSLMKKQSLKN    | 1047 |
| <i>Felis_catus</i>           | 983  | LLIGEVMSTVLSQEGIDILTHLPGGNAEAEELMSIVPVFVFYVFHYLEAGKNWNIFSTNSLIQNQLRK   | 1048 |
| <i>Sus_scrofa</i>            | 982  | LLIGEVMSTVLSQEGIDILTHLPGGNAEAEELMSIVPVFVFYVFHYLEAGNNWNIFSSNSLAQRQNLQK  | 1047 |
| <i>Cavia_porcellus</i>       | 982  | MLMGEVLSTVLSKEGIDIITHLPRGNAEAEELMSIVPVFVFYVFHYLEAGNNWNIFYPHSLTKKQYLK   | 1047 |
| <i>Oryctolagus_cuniculus</i> | 982  | LLIGEVLSTVLSQEGINILTHLPGGSAEAEELMSVAPVFVFYVFHYLETGNHWDIFSPNSLIKKQDLK   | 1047 |
| <i>Rattus_norvegicus</i>     | 991  | LLIGEFLLSTVLSKEGIDILTHLPGGSAEAEELMSIVPVFVFYVFHYLEAGNHWNIFHPDTLARKQSLQK | 1056 |
| <i>Mus_musculus</i>          | 991  | LLVGEFLSTVLSKEGINILTHLPGGSAEAEELMSIAPVFVFYVFHYLEAGNHWNIFYPDTLSKRQSLK   | 1056 |
| <i>Homo_sapiens</i>          | 1048 | KLKEGMLSIMSRYRNADYSYSVWKGGSASTWLTAFALRVLGQVNKYVEQNQNSICNSLLWLVENYQL    | 1113 |
| <i>Macaca_mulatta</i>        | 1048 | KLKEGMVSIMSRYRNADYSYSVWKGGSASTWLTAFALRVLGQVHKYVEQNQNSICNSLLWLVENYQL    | 1113 |
| <i>Canis_lupus</i>           | 1048 | QLKQGMVSIITSYRNADYSYSMWKGGDASTWLTAFALRVLGQVQKYIGQNQNSICNTLLWLTENCQL    | 1113 |
| <i>Felis_catus</i>           | 1049 | KLKEGMVSIMSRYRNADSSYSMWKGGDASTWLTAFALRVLGQLNKYIEQNQNSICNTLLWLVENCQL    | 1114 |
| <i>Sus_scrofa</i>            | 1048 | KLREGVVSVMFSRNADHSYSMWKGGDASTWLTAFALRVLGQASKYIDQDLNSICNSLLWLVEKQCL     | 1113 |
| <i>Cavia_porcellus</i>       | 1048 | KIKEGMVSIMSRYRNADYSYSMWKGGDASTWLTAFALRVLGQVNKYVEQNQNSICNSLLWLVEKQCL    | 1113 |
| <i>Oryctolagus_cuniculus</i> | 1048 | KLKEGIVSIMSRYRNADHSYSMWKGGDASTWLTAFALRVLGQVNKYVEHNQNLICNSLLWLVEKQCL    | 1113 |
| <i>Rattus_norvegicus</i>     | 1057 | KIKEGLVSVMSRYRNADYSYSMWKGASSAWLTAFALRVLGQVNKYVKQDQYSTICNSLLWLIEKQCL    | 1122 |
| <i>Mus_musculus</i>          | 1057 | KIKQGVVSVMSRYRNADYSYSMWKGASASTWLTAFALRVLGQVAKYVKQDENSTICNSLLWLVEKQCL   | 1122 |
| <i>Homo_sapiens</i>          | 1114 | DNGSFKENSQYQPIKLQGTLPVEARENLYLTAFTVIGIRKAFDICPLVKIDTALIKADNFLLNT       | 1179 |
| <i>Macaca_mulatta</i>        | 1114 | DNGSFKENSQYQPIKLQGTLPVEARENLYLTAFTVIGIRKAFDICPLVKINTALIKADTFLLNT       | 1179 |
| <i>Canis_lupus</i>           | 1114 | ENGSFKENSQYQPVKLQGTLPTEAHEHSLYLTAFAVIGIRKSFDLCPQLKINAALTRADAFLLLEGA    | 1179 |
| <i>Felis_catus</i>           | 1115 | ENGSFKENSQYQPIKLQGTLPVEARENTLYLTAFAVIGIRKAFDICSMLKINTAITKADTFLLNT      | 1180 |
| <i>Sus_scrofa</i>            | 1114 | GNGSFKENSEYQPIKLQGTLPVEAQENTLYLTAFAVIGIRKAFDLCPLMKISMALTKADTFLLNT      | 1179 |
| <i>Cavia_porcellus</i>       | 1114 | ENGSFKENSHYQPVKLQGTLPVEAENVLYLTAFTVIGIRKAFDICPLVKISAAVTKADTFLLNT       | 1179 |
| <i>Oryctolagus_cuniculus</i> | 1114 | ENGSFKDSDSKYQPIKLQGTLPVEAKENLYLTAFTVIGIRKAFDLCPLKISTALTKAENFLLNT       | 1179 |
| <i>Rattus_norvegicus</i>     | 1123 | ENGSFKENSQYLPKIKLQGTLPVEAENTLYLTAFTVIGIRKAFDLCPLKISTALTKAENFLLERT      | 1188 |
| <i>Mus_musculus</i>          | 1123 | ENGSFKENSQYLPKIKLQGTLPVEAENTLYLTAFTVIGIRKAFDLCPLKISTALTKAENFLLERT      | 1188 |
| <i>Homo_sapiens</i>          | 1180 | LPAQSTFTLAIASAYALSLGDKTHPQFRSIVSALKREALVK-GNPPPIYRFWKDNLQ-HKDSSVPNTG   | 1243 |
| <i>Macaca_mulatta</i>        | 1180 | LPAQSTFTLAIASAYALSLGDKTHPQFRSIVSALKREALVK-GNPPPIYRFWKDSLQ-HKDSSVPNTG   | 1243 |
| <i>Canis_lupus</i>           | 1180 | PSARSTFTLAIASAYALSLGDRTHPQFYSIVSGLKRRKALVK-GTARS-----                  | 1224 |
| <i>Felis_catus</i>           | 1181 | LSAQSTFTLAIASAYALSLGDKTHPQFRSIVSALKKKALVK-GDPVIYRFWKDDLQ-ESTSTPSPS     | 1244 |
| <i>Sus_scrofa</i>            | 1180 | RSTRSTFALAIASAYALSLGDKSHPQFRSIVSALKKEALVK-GNPPPIYRFWKDDLQ-KDRSVPNTG    | 1243 |
| <i>Cavia_porcellus</i>       | 1180 | VLSQNTFTLAIIVTYALSLGDRTHPQLRSIVSALKRRASVK-GNPPPIYRFWKDSLQ-EGSFAPNAA    | 1243 |
| <i>Oryctolagus_cuniculus</i> | 1180 | LPAQSTFTLAIASAYALSLGDRTHPQFRAIASALKRAASVKGSPPIYRFWKDGLQHKDTSAPNAG      | 1245 |
| <i>Rattus_norvegicus</i>     | 1189 | LPSKSTFTLAIIVAYALSLGDRTHPKFRSIVSALKREALVK-GDPPPIYRFWRDLQR-PDSSAPNSG    | 1252 |
| <i>Mus_musculus</i>          | 1189 | LPSKSTFTLAIIVAYALSLGDRTHPRFRLIVSALRKEAFVK-GDPPPIYRYWRDLQR-PDSSVPSSG    | 1252 |
| <i>Homo_sapiens</i>          | 1244 | TARMVETTAYALLTSLNLKDINYNPVIKWLSEEQRYGGGFYSTQDTINAIEGLTEYSLLVKQ         | 1306 |
| <i>Macaca_mulatta</i>        | 1244 | TARMVETTAYALLTSLNLKDINYNPVIKWLSEEQRYGGGFYSTQDTINAIEGLTEYSLLVKQ         | 1306 |
| <i>Canis_lupus</i>           | 1225 | -----CPRRRDTINAIEGLTEYSLLIKQ                                           | 1247 |
| <i>Felis_catus</i>           | 1245 | TAHVETTAYALLTSLSLKDINYNPVIKWLSEEQRYGGGFYSTQDTINAIEGLTEYSLLIKQ          | 1307 |
| <i>Sus_scrofa</i>            | 1244 | TARMVETTAYALLTSLNLKDMNYPVIKWLSEEQRYGGGFYSTQDTINAIEGLTEYSLLIKN          | 1306 |
| <i>Cavia_porcellus</i>       | 1244 | TATMVETTSYALLTSLNLKDMNYPVIKWLSEEQRYGGGFYSTQDTINAIEGLTEYSLLIKQ          | 1306 |
| <i>Oryctolagus_cuniculus</i> | 1246 | TAGMVETTAYALLTSLNLKEMNYPVIKWLSEEQRYGGGFYSTQDTINAIEGLTEYSLLVKQ          | 1308 |
| <i>Rattus_norvegicus</i>     | 1253 | TAGMVETTAYALLTSLNLKETSYPVIKWLSEEQRYGGGFYSTQDTINAIEGLTEYSLLVKQ          | 1315 |
| <i>Mus_musculus</i>          | 1253 | TAGMVETTAYALLASLKLKDMNYANPVIKWLSEEQRYGGGFYSTQDTINAIEGLTEYSLLKQ         | 1315 |

## Supplementary Figure 6

RaCI contacts mapped onto cross-species sequence alignment of the C5d domain of C5.

C5 residues that make contact with one or more RaCIs in the crystal structures are highlighted in black (van der Waals interaction) and red (salt or hydrogen bonds). The large deletion in the *Canis lupus* sequence is likely due to sequencing or assembly errors and may not represent the actual sequence.



## CUB - C5d

|                              |      |                                                                                               |      |
|------------------------------|------|-----------------------------------------------------------------------------------------------|------|
| <i>Homo sapiens</i>          | 932  | EGVKRESYSGVTLDPGGIYGT <b>ISRRKE</b> FPYRIPLDLVPKTEIKRILSVKGLLVGEILSAVLSQE                     | 995  |
| <i>Macaca mulatta</i>        | 932  | EGVKRESYSGITLDPGGIYGT <b>ISRRKE</b> FPYRIPLDLVPKTEIKRILSVKGLLVGEILSAVLSRE                     | 995  |
| <i>Canis lupus</i>           | 932  | EGIKKESYAGVTLDPGGIYGV <b>ISRRKE</b> FPYRIPLDLVPKTEVKRIVSVKGMLMGEVMSAVLSQE                     | 995  |
| <i>Felis catus</i>           | 933  | EGIKKESYAGVTLDPGGIYGVV <b>SRRKE</b> FPYRIPLDLVPKTKVKRIVSVKGLLIGEVMSVTLVLSQE                   | 996  |
| <i>Sus scrofa</i>            | 932  | EGVKRESYAGITLDPGGIYGAMT <b>RRKE</b> FPYRVPLDLVPKTKVKRIVSVKGLLIGEVMSAVLSQE                     | 995  |
| <i>Cavia porcellus</i>       | 932  | EGVKRESYAGVTLDPGGIYGT <b>TRRKE</b> LPYKIPDLVPKTNVKRILSVKGMLMGEVLSTVLSKE                       | 995  |
| <i>Oryctolagus cuniculus</i> | 932  | EGVKRETHAGVTLDPGGIYGVV <b>SRRKE</b> FPYRIPLDLVPKTNVERIVSVKGLLIGEVLSAVLSKE                     | 995  |
| <i>Rattus norvegicus</i>     | 941  | EGIKKESYAGVTLDPGGVYGV <b>RRKE</b> FPYRIPLDLVPKTNVKRILSVKGLLIGEFVLSVLSKE                       | 1004 |
| <i>Mus musculus</i>          | 941  | EGVKRESYAGVILDPKGIIRGIVN <b>RRKE</b> FPYRIPLDLVPKTKVERILSVKGLLVGEFLSTVLSKE                    | 1004 |
| <i>Homo sapiens</i>          | 996  | GINILTHLPGKSAEAEELMSVVPVYFVYFHYLETGNHWNIFHSDPLIEKQKLLKLLKEGMLSIMS                             | 1059 |
| <i>Macaca mulatta</i>        | 996  | GINILTHLPGKSAEAEELMSVVPVYFVYFHYLETGNHWNIFHSDPLIEKRNLEKLLKEGMSIMS                              | 1059 |
| <i>Canis lupus</i>           | 996  | GIDILTHLPGKNAEAEELMSVVPVYFVYFHYLEAGSNWNIFSPNSLMKKQSLKNQLKQGMVITSY                             | 1059 |
| <i>Felis catus</i>           | 997  | GIDILTHLPGKNAEAEELMSIVPVYFVYFHYLEAGKNWNIFSTNSLIQNQLRKKLKEGMSIMS                               | 1060 |
| <i>Sus scrofa</i>            | 996  | GIDILTHLPGKNAEAEELMSIVPVYFVYFHYLEAGNNWNIFSSNSLAQRQNLQKLLREGVSVMSF                             | 1059 |
| <i>Cavia porcellus</i>       | 996  | GIDIITHLPRGNAEAEELMSIVPVYFVYFHYLEAGNNWNIFYPHSLTKKQYLKLLKEGMSIMS                               | 1059 |
| <i>Oryctolagus cuniculus</i> | 996  | GINILTHLPGKSAEAEELMSVAPVYFVYFHYLETGNHWDIFSPNSLIKKQDLKLLKEGIVSIMS                              | 1059 |
| <i>Rattus norvegicus</i>     | 1005 | GIDILTHLPGKSAEAEELMSIVPVYFVYFHYLEAGNNWNIFHPDTLARKQSLKQKIKKEGLVMSY                             | 1068 |
| <i>Mus musculus</i>          | 1005 | GINILTHLPGKSAEAEELMSIAPVYFVYFHYLEAGNNWNIFYPDTLSKRQSLKLLKEGIVSIMS                              | 1068 |
| <i>Homo sapiens</i>          | 1060 | RNADYSYSVWKGGSASTWLTAFALRVLGQVNYVEQNQNSICNSLLWLVENYQLDNGSFKENSQ                               | 1123 |
| <i>Macaca mulatta</i>        | 1060 | RNADYSYSVWKGGSASTWLTAFALRVLGQVHYVEQNQNSICNSLLWLVENYQLDNGSFKENSQ                               | 1123 |
| <i>Canis lupus</i>           | 1060 | RNADYSYSMWKGGDASTWLTAFALRVLGQVQYIGQNNQNSICNTLLWLVENCQLENGSFKENSQ                              | 1123 |
| <i>Felis catus</i>           | 1061 | RNADSSYSMWKGGASASTWLTAFALRVLGQLNKYIEQNQNSICNTLLWLVENCQLENGSFKENS                              | 1124 |
| <i>Sus scrofa</i>            | 1060 | RNADHSYSMWKSGSASTWLTAFALRVLGQASKYIDQDLNSICNSLLWLVKQCQLGNGSFKENSE                              | 1123 |
| <i>Cavia porcellus</i>       | 1060 | RNADYSYSMWKGGASASTWLTAFALRVLGQVNYVEQNQNSICNSLLWLVENCQLENGSFKENS                               | 1123 |
| <i>Oryctolagus cuniculus</i> | 1060 | RNADHSYSMWKGGASASTWLTAFALRVLGQVNYVEHNQNLICNSLLWLVENCQLENGSFKDSSK                              | 1123 |
| <i>Rattus norvegicus</i>     | 1069 | RNADYSYSMWKGGASASTWLTAFALRVLGQVNYVVKQDQYSICNSLLWLVKQCQLGNGSFKENSQ                             | 1132 |
| <i>Mus musculus</i>          | 1069 | RNADYSYSMWKGGASASTWLTAFALRVLGQVAKYVVKQDENSCNSLLWLVKQCQLGNGSFKENSQ                             | 1132 |
| <i>Homo sapiens</i>          | 1124 | YQPIKLGQTLPEARENSLYLTAFTVIGIRKAFDICPLVKIDTALIKADNFFLENTLPAQSTFT                               | 1187 |
| <i>Macaca mulatta</i>        | 1124 | YQPIKLGQTLPEARENSLYLTAFTVIGIRKAFDICPLVKINTALIKADTFLENTLPAQSTFT                                | 1187 |
| <i>Canis lupus</i>           | 1124 | YQPVKLGQTLPEAHEHSLYLTAFAVIGIRKSFDLCPKINAALTRADAFLLLEGAPSARSTFT                                | 1187 |
| <i>Felis catus</i>           | 1125 | YQPIKLGQTLPEARENTLYLTAFAVIGIRKAFDICSLMKINTAITKADTFLENTLSAQSTFT                                | 1188 |
| <i>Sus scrofa</i>            | 1124 | YQPIKLGQTLPEAQENTLYLTAFAVIGIRKAFDLCPKIMKINTAITKADTFLENTLRSTRSTFA                              | 1187 |
| <i>Cavia porcellus</i>       | 1124 | YQPVKLGQTLPEAQENVLYLTAFTVIGIRKAFDICPLVKISAATKADTFLENTVLSQNTFT                                 | 1187 |
| <i>Oryctolagus cuniculus</i> | 1124 | YQPIKLGQTLPEAKENSLYLTAFTVIGIRKAFDLCPKIKISTALTKAENFFLENTLPAQSTFT                               | 1187 |
| <i>Rattus norvegicus</i>     | 1133 | YLPKLGQTLPEAQENTLYLTAFSVIGIRKAFDICPLVKISTALTKAENFFLENTLPSKSTFT                                | 1196 |
| <i>Mus musculus</i>          | 1133 | YLPKLGQTLPEAQEKTLYLTAFSVIGIRKAFDICPTMKIHTALDKADSFLENTLPSKSTFT                                 | 1196 |
| <i>Homo sapiens</i>          | 1188 | LAI SAYALSLGDKTHPQFRSIVSAL <b>KREALVK</b> -GNPPIYRFW <b>KDNLQ</b> -HKD <b>SSVPNT</b> TGTARMVE | 1249 |
| <i>Macaca mulatta</i>        | 1188 | LAI SAYALSLGDKTHPQFRSIVSAL <b>KREALVK</b> -GNPPIYRFW <b>KDNLQ</b> -HKD <b>SSVPNT</b> TGTARMVE | 1249 |
| <i>Canis lupus</i>           | 1188 | LAI AAYALSLGDRTHPQFYSIVSGL <b>KRALVK</b> -GTARS-----                                          | 1224 |
| <i>Felis catus</i>           | 1189 | LAI AAYALSLGDKTHPQFRSIVSAL <b>KKALVK</b> -GDPVIYRFW <b>KDDLQ</b> -EST <b>STP</b> SPSTAHVVE    | 1250 |
| <i>Sus scrofa</i>            | 1188 | LAI AAYALSLGDKSHPQFRSIVSAL <b>KREALVK</b> -GNPPIYRFW <b>KDDLQ</b> -KDR <b>SVPN</b> TGTARMVE   | 1249 |
| <i>Cavia porcellus</i>       | 1188 | LAI VTYALSLGDRTHPQLRSIVSAL <b>KRASVK</b> -GNPPIYRFW <b>KDNLQ</b> -EG <b>SFAPNA</b> AATATMVE   | 1249 |
| <i>Oryctolagus cuniculus</i> | 1188 | LAI AAYALSLGDRTHPQFRAIASAL <b>KRAASVK</b> GGSPPIYRFW <b>KDQLQ</b> HKDTS <b>APNA</b> GATAGMVE  | 1251 |
| <i>Rattus norvegicus</i>     | 1197 | LAI VAYALSLGDRTHPKFRSIVSAL <b>KREALVK</b> -GDPPIYRFW <b>RDTLQR</b> -PDS <b>SAPNS</b> GTAGMVE  | 1258 |
| <i>Mus musculus</i>          | 1197 | LAI VAYALSLGDRTHPRFRLIVSAL <b>KEAFVK</b> -GDPPIYRFW <b>RDTLKR</b> -PDS <b>SSVP</b> SSGTAGMVE  | 1258 |
| <i>Homo sapiens</i>          | 1250 | TTAYALLTSLNLKDIYVNPVIKWLSEEQRYGGGFYSTQDTINAIEGLTEYSLLVQKRLRSM                                 | 1313 |
| <i>Macaca mulatta</i>        | 1250 | TTAYALLTSLNLKDIYVNPVIKWLSEEQRYGGGFYSTQDTINAIEGLTEYSLLVQKRLRNM                                 | 1313 |
| <i>Canis lupus</i>           | 1225 | -----CPRRRDINAIEGLTEYSLLIKQLHLNMDV                                                            | 1254 |
| <i>Felis catus</i>           | 1251 | TTAYALLTSLSLKDIYVNPVIIRWLSEEQRYGGGFYSTQDTINAIEGLTEYSLLIKQLHLNMD                               | 1314 |
| <i>Sus scrofa</i>            | 1250 | TTAYALLTSLNLKDMNYVNPVIKWLSEEQRYGGGFYSTQDTINAIEGLTEYSLLIKNQLNMDV                               | 1313 |
| <i>Cavia porcellus</i>       | 1250 | TTSYALLTSLNLKDMNYVNPVIKWLSEEQRYGGGFYSTQDTINAIEGLTEYSLLIKQHLNMDI                               | 1313 |
| <i>Oryctolagus cuniculus</i> | 1252 | TTAYALLTSLNLKEMNYVNPVIKWLSEEQRYGGGFYSTQDTINAIEGLTEYSLLVQKQLDMDI                               | 1315 |
| <i>Rattus norvegicus</i>     | 1259 | TTAYALLTSLNLKETSIVNPVIKWLSEEQRYGGGFYSTQDTINAIEGLTEYSLLVQKHLDM                                 | 1322 |
| <i>Mus musculus</i>          | 1259 | TTAYALLASLKLKDMNYANPVIKWLSEEQRYGGGFYSTQDTINAIEGLTEYSLLKQIHLDM                                 | 1322 |
| <i>Homo sapiens</i>          | 1314 | DVSYKHKHGALHNYKMTDKNFLGRPVEVLLNDDLIV-STGFGSGLATVHVTTVVHKTSTSE                                 | 1372 |
| <i>Macaca mulatta</i>        | 1314 | DVAYKHKHGALHNYKMTDKNFLGRPVEVLLNDDLIV-STGFGSGLATVHVTTVVHKTSTSE                                 | 1372 |
| <i>Canis lupus</i>           | 1255 | KISYKHKGDLHYHKMTEKNFLGRPIEVPLNDDLIV-STGFSNGLATVHVTTVVQKTSTSE                                  | 1313 |
| <i>Felis catus</i>           | 1315 | NVSYKHKGDLHRYKMTETNFLGRPIEVPLNDDLIV-STGYSNGLATVHVTTVVQKTSTSD                                  | 1373 |
| <i>Sus scrofa</i>            | 1314 | KVSYKHRGDFYHYKITEKNFLGRPVEVPLNDDLIVVSTGQNSGLATVHVKTVVHKTSTSE                                  | 1373 |
| <i>Cavia porcellus</i>       | 1314 | NVSYKHKGDFYHYKVTDKNFLGRPVEVPLNDDLI-STGHSNGLATVHVKTVVHKTGTSE                                   | 1372 |
| <i>Oryctolagus cuniculus</i> | 1316 | NVSYKHKGNFQYKITEKNFLGKPEVPLDDDLVI-STGHSNGLATVHVATVVHKTSTSE                                    | 1374 |
| <i>Rattus norvegicus</i>     | 1323 | NVSYKHKGDFYQYKTEKNFLGRPVEVPLNDDLIV-TTGYSSGLATVYKVVHKTVAE                                      | 1381 |
| <i>Mus musculus</i>          | 1323 | NVAYKHEGDFHYKYTEKNFLGRPVEVPLNDDLIV-STGYSSGLATVYKVVHKTVAE                                      | 1381 |

### Supplementary Figure 7

OmCI contacts mapped onto cross-species sequence alignment of the CUB and C5d domains of C5.

C5 residues that make contact with OmCI in the crystal structures are highlighted in black (van der Waals interaction) and red (salt or hydrogen bonds). The large deletion in the *Canis lupus* sequence is likely due to sequencing or assembly errors and may not represent the actual sequence.

## C345c

|                              |      |                                                                   |      |
|------------------------------|------|-------------------------------------------------------------------|------|
| <i>Homo_sapiens</i>          | 1503 | KQCTMFYSTSNIKIQKVCEGAACKCVEADCGMQQEELDLTISAETRKQTACKPEIAYAYKVSIT  | 1566 |
| <i>Macaca_mulatta</i>        | 1503 | KQCTMFYSTSNIKIQKVCEGATCKCIEADCGMQKELDLTISAETRKQTACNPEIAYAYKVIIT   | 1566 |
| <i>Canis_lupus</i>           | 1444 | KQCTMFYSPSGSKLQKVCEGVTCKCIEADCGMQAELDLTISADARKETACKPDIAYAYKVHIT   | 1507 |
| <i>Felis_catus</i>           | 1504 | KQCTMFYNPFDARLQKVCEGVTCKCIEADCGMQTELDLTISADTRKETACKPDIAYAYKVRIT   | 1567 |
| <i>Sus_scrofa</i>            | 1501 | KQCTMFYSMSQTKLQKVCEGVTCKCIEADRGQMTEVDLTISVNTRKETACKPEIAYVYKVKII   | 1564 |
| <i>Cavia_porcellus</i>       | 1503 | KQCTMFYSASDTKLQKVCEEATCKCIEADCGQMEKELDLTISADARKEIACKPEIAYVYKVSIT  | 1566 |
| <i>Oryctolagus_cuniculus</i> | 1502 | KQCTMFYSTSNTKLQRVCEGTLCKCIEADCGQMEKELDLTISAETRKEKACKPEIVYAYKVSIT  | 1565 |
| <i>Rattus_norvegicus</i>     | 1512 | KQCTMIYSTSDTNLQRVCEGAACKCVEADCGQLQAELDLAISADTRKETACKPEIAYAYKVRIT  | 1575 |
| <i>Mus_musculus</i>          | 1512 | KQCTMIYSISDTRLQKVCEGAACCTCIEADCAQLQAEVDLAISADSRKEKACKPETAYAYKVRIT | 1575 |
| <i>Homo_sapiens</i>          | 1567 | SITVENFVKYKATLLDIYKTGEAVAEKDSEITFIKKVTCTNAELVKGRQYLIMGKEALQIKYN   | 1630 |
| <i>Macaca_mulatta</i>        | 1567 | SITTFENFVKYKATLLDIYKTGEAVAEKDSEITFIKKVTCTNAELVKGRQYLIMGKEALQIKYN  | 1630 |
| <i>Canis_lupus</i>           | 1508 | SITKENVFIKYATLLDVYKAGEAAAQKDSEITFIKKATCANAELEKGRHYLIMGKEALQIKHN   | 1571 |
| <i>Felis_catus</i>           | 1568 | SITKENVFKYTATLLDIYKAGEAVAQKDSVTFIKKVTCANADLEKGRQYLIMGKEALQIKYN    | 1631 |
| <i>Sus_scrofa</i>            | 1565 | AMTEESAFVKYTASLLDVYKAGEAVAEGSEITFIKKTTCTNANLEKGRQYLIMGKEALQIKHN   | 1628 |
| <i>Cavia_porcellus</i>       | 1567 | SMMKENAFVKYTATLLDIYKAGDAVAEKGEITFIKKVSCANADLEKGRQYLIMGKEALQIKHN   | 1630 |
| <i>Oryctolagus_cuniculus</i> | 1566 | SITEENFVKYTATLLDVYKTGEAIAEKGEITFIKKTTCANADLLKGRQYLIMGKEALQIKHN    | 1629 |
| <i>Rattus_norvegicus</i>     | 1576 | SATEENIFVKYTATLLDIYKTGEAAAQKDSEITFIKKISCTNANLVKGRQYLIMGKEALQIKHN  | 1639 |
| <i>Mus_musculus</i>          | 1576 | SATEENFVKYTATLLVTYKTGEAAD-ENSEVTFIKKMSCTNANLVKGRQYLIMGKEVLQIKHN   | 1638 |
| <i>Homo_sapiens</i>          | 1631 | FSFRYIYPLDSLWIEYWPRD-TTCSSCQAFLANLDEFAEDIFLNGC---                 | 1676 |
| <i>Macaca_mulatta</i>        | 1631 | FTFRYIYPLDSLWIEYWPRD-TTCSSCQAFLANLDEFAEDIFLNGC---                 | 1676 |
| <i>Canis_lupus</i>           | 1572 | FSFKYIYPLDSSTWIEYWPTADAACPACPAFLANLDEFAEDIFLNGCENS                | 1621 |
| <i>Felis_catus</i>           | 1632 | FSFKYLYPLDSSTWIEYWPTN-AMCPSCQAFLANLDEFAEDIFLNGCENP                | 1680 |
| <i>Sus_scrofa</i>            | 1629 | FNFKYIYPLDSSTWIEYWPTD-TACPSCQTFLANLDEFTEDI FLNNCENA               | 1677 |
| <i>Cavia_porcellus</i>       | 1631 | FSFKYIYPLDSSTWIEYWPS--VTCSSCQAFLANLDEFAEDIFLNGCENA                | 1678 |
| <i>Oryctolagus_cuniculus</i> | 1630 | FSFKYIYLLDSWTWIEYWPSD-TTCPSCQAFSANLDEFAEDIFLNGCENA                | 1678 |
| <i>Rattus_norvegicus</i>     | 1640 | FSFKYIYPLDSSTWIEYWPTD-TTCPSCQAFVANLDEFAEDIFLNGCENA                | 1688 |
| <i>Mus_musculus</i>          | 1639 | FSFKYIYPLDSSTWIEYWPTD-TTCPSCQAFVENLNNFAEDLFLNSCE--                | 1685 |

### Supplementary Figure 8

OmCI contacts mapped onto cross-species sequence alignment of the C345c domain of C5.

C5 residues that make contact with OmCI in the crystal structures are highlighted in black (van der Waals interaction) and red (salt or hydrogen bonds).

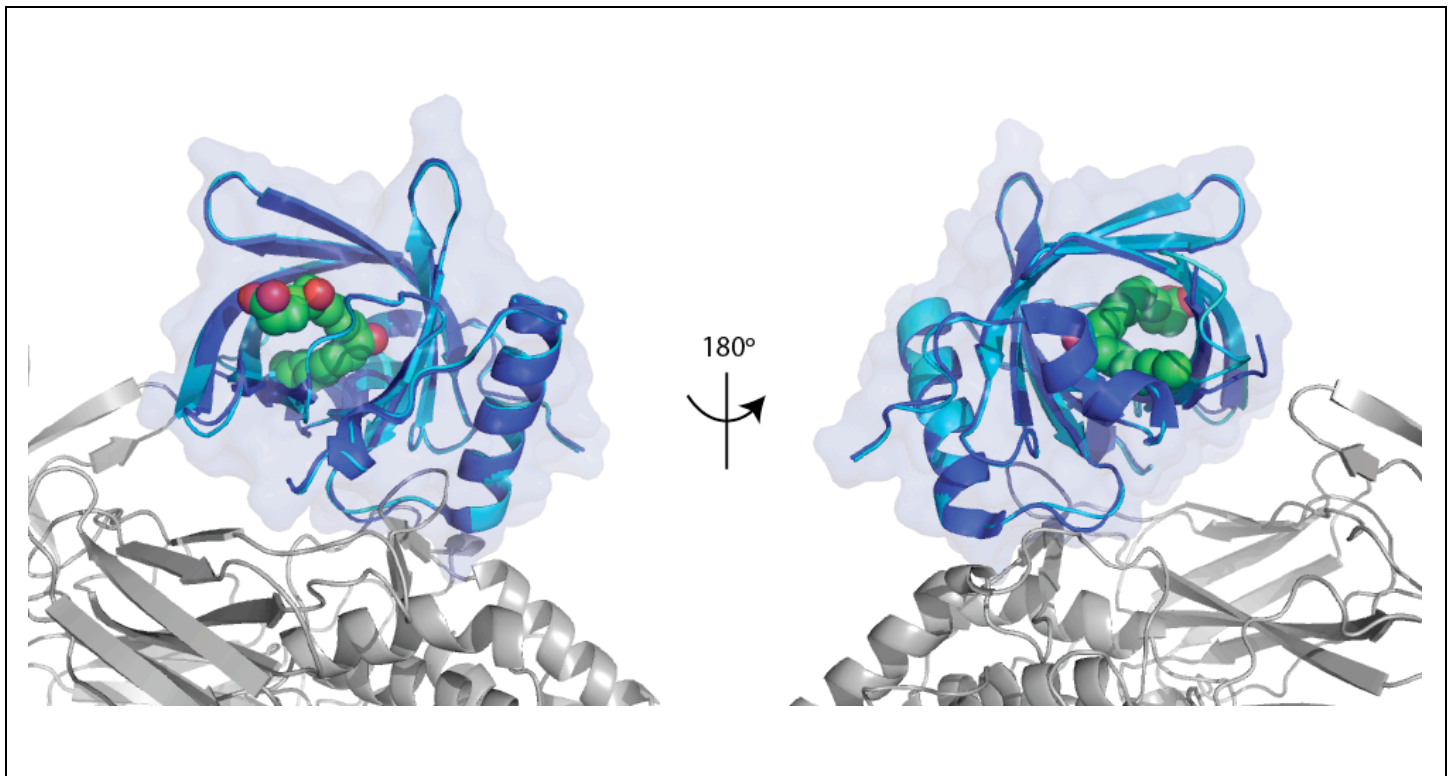

### Supplementary Figure 9

OmCI can bind C5 and LTB4 simultaneously

An overlay of the structure of OmCI (blue cartoon) in complex with LTB4 (VDW spheres, carbon-green, oxygen-red) (PDB ID 3zuo; Roversi et al., J. Biol. Chem 288, 18789-18802, 2013) onto OmCI (cyan cartoon) in complex with C5 (grey cartoon) demonstrates that LTB4 binding and exchange are both compatible with C5 binding. Two views related by a rotation of 180 degrees are shown with the view on the right hand side being equivalent to the views of the complex shown in Fig. 2.

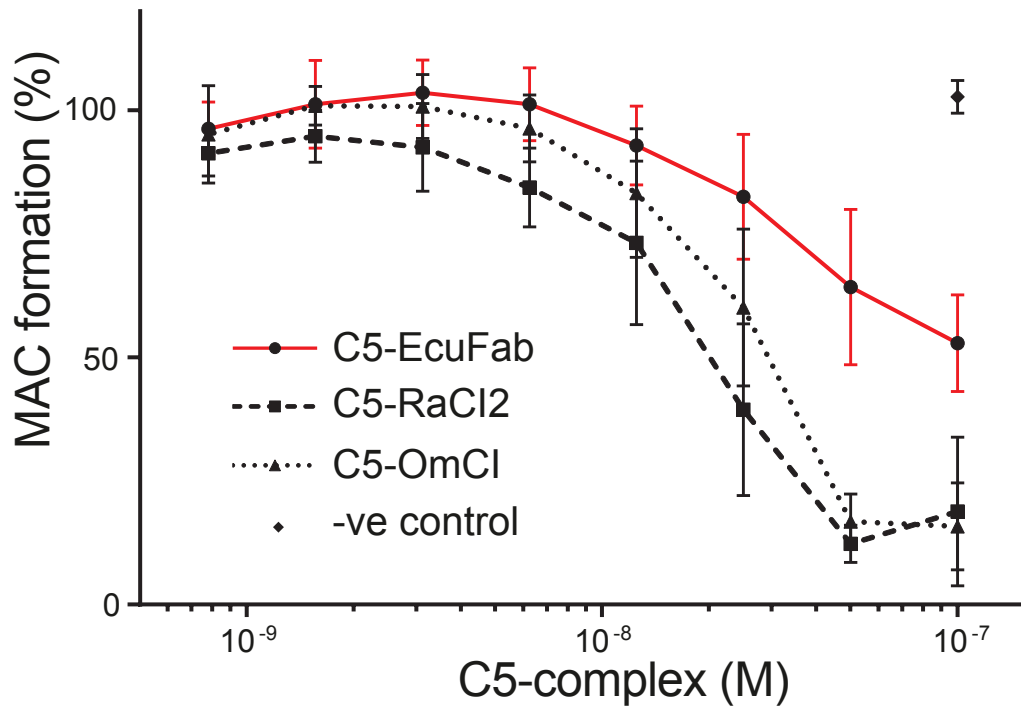

**Supplementary Figure 10**

The binary inhibited C5 complexes are competitive inhibitors of further C5 cleavage by the native convertase

Purified binary C5 complexes with any of OmCl, RaCl or EcuFab compete with C5 at an initial stage of the activation pathway. -ve control is histamine-binding protein 2. Error bars, s.e.m. ( $n = 6$ ; 2 independent experiments with 3 technical replicates each).

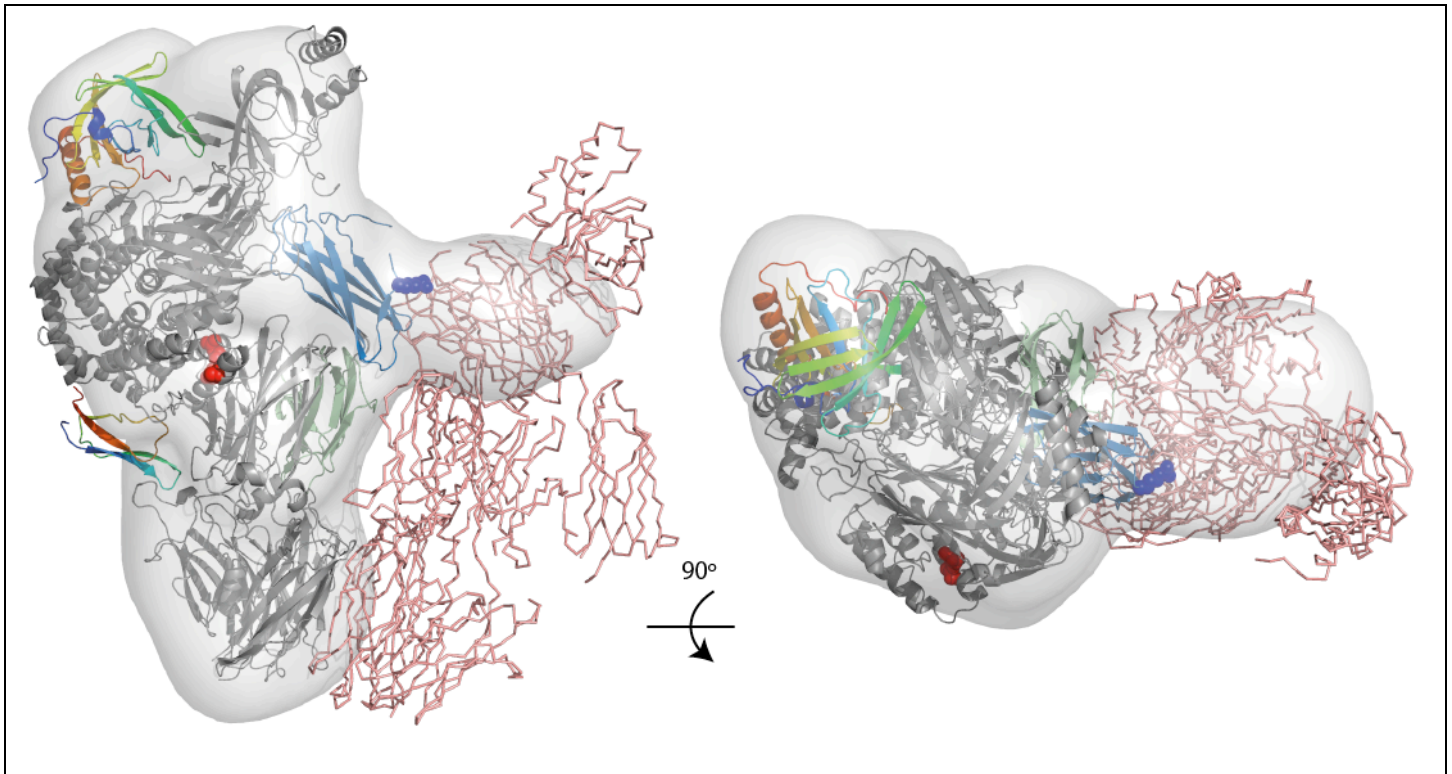

**Supplementary Figure 11**

Eculizumab sterically hinders the binding of CVF to C5.

Crystal structure of C5-OmCI-RaCI fitted in the EM envelope as in Figure 5E. Superposition of C5-CVF complex (Laursen *et al.*, *EMBO J.* **9**,606-616, 2011) on the C5-OmCI-RaCI structure results in a steric clash between CVF (salmon ribbon) and the EM volume where the Fab is positioned.
