# Supplementary material
Source: PubMed Central journal article supplement (PMC5771465)
Supplement: NIHMS75715-supplement-SI_Tables.pdf [file NIHMS75715-supplement-SI_Tables.pdf]

**Supplementary table 1.** Sequence identity (%) at the amino acid level between different RaCIs

|              | <b>RaCI2</b> | <b>RaCI3</b> | <b>RaCI6</b> | <b>RaCI7</b> | <b>RaCI4</b> | <b>RaCI1</b> | <b>RaCI5</b> |
|--------------|--------------|--------------|--------------|--------------|--------------|--------------|--------------|
| <b>RaCI2</b> | 100          | 41           | 38           | 42           | 40           | 42           | 38           |
| <b>RaCI3</b> |              | 100          | 71           | 73           | 44           | 35           | 36           |
| <b>RaCI6</b> |              |              | 100          | 76           | 47           | 36           | 38           |
| <b>RaCI7</b> |              |              |              | 100          | 45           | 35           | 37           |
| <b>RaCI4</b> |              |              |              |              | 100          | 38           | 35           |
| <b>RaCI1</b> |              |              |              |              |              | 100          | 40           |
| <b>RaCI5</b> |              |              |              |              |              |              | 100          |

**Supplementary Table 2** Plasmids, primers and synthetic genes used in this study

| Plasmid   | Description                                        | Restriction sites | Primers                             | Expression                        |
|-----------|----------------------------------------------------|-------------------|-------------------------------------|-----------------------------------|
| pEpreS2-2 | From Express2ion Biotechnologies, Denmark          |                   |                                     | <i>Drosophila melanogaster</i> S2 |
| pMJ41     | Modified pExpress2-2 vector; Kozak-BIP-His6-NgoMIV | Acc65I/EcoRI      | MJ41 + MJ42 (annealed and inserted) |                                   |
| pMJ80     | pMJ41 His6-RaCl1                                   | NgoMIV/NotI       |                                     |                                   |
| pMJ85     | pExpress2-2 RaCl2 (native signal peptide)          | EcoRI/NotI        |                                     |                                   |
| pMJ81     | pExpress2-2 RaCl3 (native signal peptide)          | EcoRI/NotI        |                                     |                                   |
| pMJ82     | pExpress2-2 RaCl4 (native signal peptide)          | EcoRI/NotI        |                                     |                                   |
| pMJ84     | pExpress2-2 RaCl5 (native signal peptide)          | EcoRI/NotI        |                                     |                                   |
| pMJ83     | pExpress2-2 RaCl7 (native signal peptide)          | EcoRI/NotI        |                                     |                                   |
| pMJ100    | pETM14 RaCl1 (no signal peptide)                   | NcoI/NotI         |                                     |                                   |
| pMJ99     | pETM14 RaCl2 (no signal peptide)                   | NcoI/NotI         |                                     |                                   |
| pMJ97     | pETM14 RaCl3 (no signal peptide)                   | BspHI/NotI        |                                     |                                   |
| pMJ98     | pETM14 RaCl4 (no signal peptide)                   | NcoI/NotI         |                                     |                                   |
| pMJ111    | pETM14 - RaCl2 ΔC10 (for NMR experiments)          |                   | MJ127 + MJ128 (template = pMJ99)    |                                   |
| pMJ103    | pETM14 - RaCl2 ΔN10                                |                   | MJ87 + MJ88 (template = pMJ99)      |                                   |
| pMJ104    | pETM14 - RaCl2 ΔC18                                |                   | MJ149 + MJ150 (template pMJ99)      |                                   |
| pMJ15     | pKLAC2-His10-OmCl wildtype <sup>1</sup>            |                   | MJ6 + MJ8                           | <i>Kluyveromyces lactis</i>       |
| pMJ19     | pKLAC2-His10-OmCl N78Q                             |                   | MJ20 + MJ21 (template = pMJ15)      |                                   |
| pMJ27     | pKLAC2-His10-OmCl N78Q/N102Q                       |                   | MJ22 + MJ23 (template = pMJ19)      |                                   |

| Primer | Sequence                                                                                  | Description                        |
|--------|-------------------------------------------------------------------------------------------|------------------------------------|
| MJ6    | GCGCGGCGGCGCCCTAGCAGTCCTTGAGATGGGGAT                                                      | OmCl + stopcodon + NotI (rv)       |
| MJ8    | GGCCCCCTCGAGAAAAGAATGGCTAGCCATCACCATCACCATCACCATCACCATCACTCCGGAGACAGCGAAAAGCCGACTGCACTG   | XhoI + His10 + OmCl (fw)           |
| MJ20   | CGGTGATGATGACGTTTAAGCAAGGCACAGACTGGGCTTCAACCG                                             | OmCl - N78Q (fw)                   |
| MJ21   | CGGTTGAAGCCAGTCTGTGCC <del>TTGCT</del> TAAACGTCATCATCACCG                                 | OmCl - N78Q (rv)                   |
| MJ22   | GGTAACGGCAACCCTTGGTCAACTAACCCAAATAGGGAAGTGG                                               | OmCl - N102Q (fw)                  |
| MJ23   | CCACTTCCCTATTTTGGGTAGTTGACCAAGGGTTGCCGTACC                                                | OmCl - N102Q (rv)                  |
| MJ41   | GTACCGCCACCATGAAGCTGTGCATCCTGCTGGCCGTGGTGGCCCTCGTGGGACTGAGCCTGGGACACCACCACCATCACCACGGCGCG | Acc65I-Kozak-BIP-His6-NgoMIV-EcoRI |
| MJ42   | AATTCGCGGGCGTGGTGATGGTGGTGGTGTCCCAGGCTCAGTCCCAGGAAGGCCACCACGGCCAGCAGGATGCACAGTTCATGGTGGCG | Acc65I-Kozak-BIP-His6-NgoMIV-EcoRI |

|       |                                              |                 |
|-------|----------------------------------------------|-----------------|
| MJ87  | CTGTTCCAGGGGCCCATGAAAGATCAGTGTGCAAATG        | RaCl2 ΔN10 (fw) |
| MJ88  | CATTTGCACACTGATCTTTATGGGCCCTGGAACAG          | RaCl2 ΔN10 (rv) |
| MJ127 | CACCGAAAAGCACCACCACCTAAACCGAACAGAGCTTTAATATG | RaCl2 ΔC10 (fw) |
| MJ128 | CATATTAAGCTCTGTTCCGGTTAAGGTGGTGGTCTTTTCGGTG  | RaCl2 ΔC10 (rv) |
| MJ149 | CACCTGTTATCTGCTGGCATAAACACCGAAAAGCACCACC     | RaCl2 ΔC18 (fw) |
| MJ150 | GGTGGTCTTTTCGGTGTTATGCCAGCAGATAACAGGTG       | RaCl2 ΔC18 (rv) |

| Synthetic gene <sup>2</sup> | Sequence                                                                                                                                                                                                                                                                                                                                                                                                                               |
|-----------------------------|----------------------------------------------------------------------------------------------------------------------------------------------------------------------------------------------------------------------------------------------------------------------------------------------------------------------------------------------------------------------------------------------------------------------------------------|
| RaCl1 (pMJ80)               | CGAATTGGCGGAAGGCCGTC AAGGCCACGTGCTTTGTCCAGAGCTCGCCGGCGAGGAAGTGAAGACCACCCCATCCCCAACCC ACCAGTGCCTGAACGCCACGTGCGAGCGCAAGCTGGATGCCCTGGGCAATGCCGTGATCACC AAGTGCCACAGGGCTGCCTG TGCGTCTGTCGCGGAGCCAGCAATATCGTGCCCGCAACGGAACTGCTTCCAGCTGGCCACCACCAAGCCACCAATGGCCCC AGGGGATAACAAGGACAACAAGGAGGAGGAGTCCAAGTGA <u>CGCGCCGCGGT</u> ACCTGGAGCACAAGACTGGCCTCATGGGCCT CCGCTCACTGC                                                                     |
| RaCl2 (pMJ85)               | CGAATTGAAGGAAGGCCGTC AAGGCCACGTGCTTTGTCCAGAGCTCGAATTCGCCACCATGAACGCCGTGACCGTGTGGCCTT TACCGCCTTCGCCCTGATTGTGCACGATTGCTACAGCGAGGAGGCCAACACCACCCCATCAGCGTGAAGGATCAGTGCGCCAA CGTGACCTGCCGCGCACCGTGGATAATCGCGGCAAGCGCCACATCGATGGCTGCCACCAGGATGCCCTGTGCGTGTGAAGG GCCCGATAGCAAGGATAACCTGGATGGCACGTGCTACCTGCTGGCCACCACCCCAAAGAGCACCACCACAGTACCCGAGCAG AGCTTCAACATGGAGGAGTAGCGCGCCGCGGTACCTGGAGCACAAGACTGGCCTCATGGGCCTTCTTTCACTGC               |
| RaCl3 (pMJ81)               | CGAATTGGCGGAAGGCCGTC AAGGCCACGTGCTTTGTCCAGAGCTCGAATTCGCCACCATGGCCGCCCTGAATGGCCTGGTGTG TCTGCTGCTGACCATCAGCGCCATGTTTCATCAGCGAGTGTACAGCAGCGCGGAGAGCCAGAGCATTCAAGCGCAAGGACAGT GCGAGGAAGTGTATGTCACCCGAAGCTGAACCACTGGGAGAGCGCGTGACCAAGCGGATGCCAACCGGATGCCCTGTGCGTG ATCCGCGAGCCCGATAACGTGGACAACGCCAACGGAACCTGCTACGCGCTGATGAGCAGCACCACCACGACCACGACGACCC CAGATGGAACCAACCTCCGAAGGAGGAGTAGCGCGCCGCGGTACCTGGAGCACAAGACTGGCCTCATGGGCCTTCCGCTC ACTGC |
| RaCl4 (pMJ82)               | CGAATTGGCGGAAGGCCGTC AAGGCCACGTGCTTTGTCCAGAGCTCGAATTCGCCACCATGAGCGCCTTCAACATCTTCGCCCT GGTGCTGGTGTGTGCGCCCTGATGATCAACGAGTGTGCTGACCAAGCCAGGAGCCACCACCCACTGAAGGCCGCCAGTCACT GACGCAACGTGAAGTGCAGCGCCGCTTCGATCAGCTGGGCAATAGTGTGACCGAGGGGTGCCAAAGCGGATGCCCTGTGCGTG TACCAGGCCACCGGTACAACCAAGGAGGCCAACGGAACCTGCTACGAGCTGATGAAGACTCGACCACCAGCAGCAGCCGAGGG AACCCAGCCCATAGCGCGCCGCGGTACCTGGAGCACAAGACTGGCCTCATGGGCCTTCCGCTCACTGC                  |
| RaCl5 (pMJ84)               | CGAATTGGCGGAAGGCCGTC AAGGCCACGTGCTTTGTCCAGAGCTCGAATTCGCCACCATGAACGCCGTGATCGTGTGCGT GACCATCAGCGCCGTGCTGATCCACCAGTGTACAGTACCCGCGGAGCCACCCTGAGCATCAAGCGCGGCGATATGTGCATCG AGAAGACCTGCAACCGCTCCATCGATGCCCGGGAAGAAAGTGTGCGCGGATGCCAGGCGGCTGCCTGTGCGTGTTC AACGTGTCCGATGTGACCTACCCCGCAACGGCACGTGCTATCAGCTGGCCACCACCACGACCAATCGCCCAAGCGCCGCTGATGGA GCGCGAGCGCTAAGCGGCCGCGGTACCTGGAGCACAAGACTGGCCTCATGGGCCTTCCGCTCACTGC                          |
| RaCl7 (pMJ83)               | CGAATTGGCGGAAGGCCGTC AAGGCCACGTGCTTTGTCCAGAGCTCGAATTCGCCACCATGGCCGCCCTGAATGGCCTGGTGTG TCTGCTGCTGACCATCAGCGCCATGTTTCATCAGCGAGTGTACAGCAGCGCGGAGAGCCAGAGCATTCAAGCGCAAGGACAGT GCGAGGAAGTGAAGTGCAGCGCCACCGTGAATCAGCTGGGAGTGGCCGTGACCAAGCGGATGCCAAAGTGGATGCCCTGTGCGTG ATCAGCGCCCGAGATAGCGCCGTGAACGTGAACGGCACGTGCTACCAAGCTGATGGGCTCCACCAGTACCACCACCAGCAGCAC CCCAAGCAGCGAGGATCAGGAGTAGCGCGCCGCGGTACCTGGAGCACAAGACTGGCCTCATGGGCCTTCCGCTCACTGC   |
| RaCl1 (pMJ100)              | CGAATTGAAGGAAGGCCGTC AAGGCCACGTGCTTTGTCCAGAGCTCCCATGGAAGAAGTTAAACCACCCGATTCCGAATCATC AGTGTGTTAATGCAACCTGTGAACGTAAACTGGATGCACTGGGTAATGCAAGTATTACCAATGTCGCGAGGGTGTCTGTGTGTT GTTCGTGGTGCAAGCAATATTGTTCCGGCAAAATGGCACCTGTTTTACGCTGGCAACCACCAACCGCCTATGGCACGGGTGATA ATAAAGATAACAAGAAGAAGAAAGCAATTAAGCGGCCGCGGTACCTGGAGCACAAGACTGGCCTCATGGGCCTTCTTTCACTG C                                                                                   |
| RaCl2 (pMJ99)               | GGCCCCATGGAGGAAGCAAA TACCACCCGATTAGCGTTAAAGATCAGTGTGCAAATGTTACCTGTCGTCGTACCGTTGATAAT CGTGGTAAACGTCATATTGATGGTTGTCCGCTGGTTGTCTGTGTGTTCTGAAAGGTCCGGATAGCAAAGATAATCTGGATGGCA CCTGTTATCTGCTGGCAACCACCCGAAAAGCACCACCACAGTACCGAACAGAGCTTTAATATGGAAGAGTAAGCGGCCGCGC GCG                                                                                                                                                                       |
| RaCl3 (pMJ97)               | GGCCCTCATGAGCGGTGAAAG CCGAGAGCATTACGCGTAAAGGTGAGTGTGAAGAAGTTATCTGTCATCGTAAACTGAATCATCTG GGTGAACGTGTACCAGCGGTTGTCCGACCGGTTGTCTGTGTGTTATTCTGTAACCGGATAATGTGATAATGCAAAATGGCACCT GTTATGCACTGATGAGCAGCACCACCAACCACCACGACCCGATGTTACAACCACCTCTGAAGAAGAAGATAAAGCGGCCG CGCGCG                                                                                                                                                                   |
| RaCl4 (pMJ98)               | GGCCCCATGGCACAAGAACC GACCACCCGCTGAAAGCAGCAAGCCAGTGTAGCAATGTTAAATGTCGTCGTGCTTTTGTATCAT CTGGGTAATAGCGTTACCGAAGGTTGTCGAGCGGTTGTCTGTGTGTTTATCAGGCAACCGGTTATAATCAAGAAGCAAACGGCA CCTGTTATGAGCTGATGAAAACCAAGTACCACCACCACAACCAGGTTACACCGGCACAGTAAGCGGCCGCGCGCG                                                                                                                                                                                 |

<sup>1</sup>Amplified from pMETαC-OmCl (Nunn, M.A. et al., *J. Immunol* **174**, 2084-2091, 2005).  
<sup>2</sup>Synthetic fragments were subcloned into constructs that are indicated between brackets.  
Restriction sites are underlined.

Mutations introduced with primers are in bold.  
Fw = forward primer, rv = reverse primer.
